# Supplementary material for: Self-supported tungsten/tungsten dioxide nanowires array as an efficient electrocatalyst in the hydrogen evolution reaction
Source: Royal Society of Chemistry journal article supplement (doi:10.1039/c6ra17194j), 2016-01-01
Supplement: c6ra17194j1.pdf [file c6ra17194j1.pdf]

## Self-Supported Tungsten/Tungsten Dioxide Nanowires Array as an Efficient Electrocatalyst in Hydrogen Evolution Reaction

Zhao Yaoxing,<sup>a,b</sup> Cuncai Lv,<sup>b</sup> Qingli Huang,<sup>c</sup> Zhipeng Huang,<sup>b\*</sup> Chi Zhang<sup>b\*</sup>

<sup>a</sup> School of Chemistry and Chemical Engineering, Jiangsu University, Zhenjiang  
212013, China.

<sup>b</sup> Functional Molecular Materials Research Centre, Scientific Research Academy, and  
China-Australia Joint Research Center for Functional Materials, Jiangsu University,  
Zhenjiang, 212013, China.

<sup>c</sup> Testing Center, Yangzhou University, Yangzhou, 225009, China.

\*Corresponding author. Zhipeng Huang, Chi Zhang.

E-mail: zphuang@ujs.edu.cn, chizhang@ujs.edu.cn.

### Electronic Supplementary Information

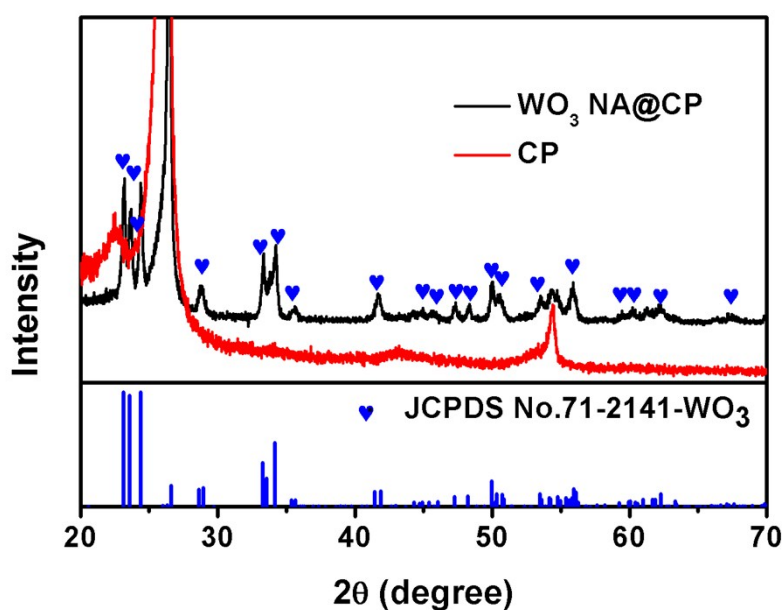

Fig. S1 XRD pattern of WO<sub>3</sub> NA@CP.

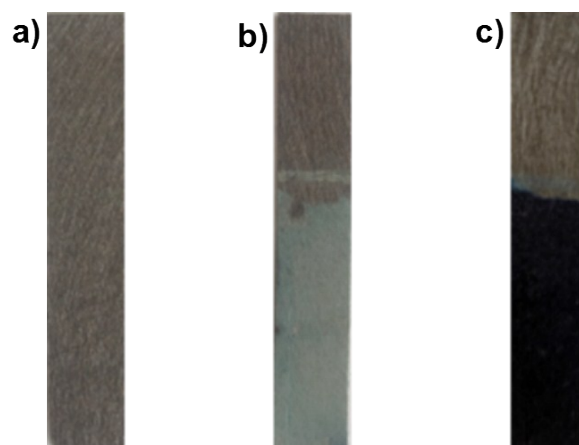

**Fig. S2** Optical photograph of (a) pristine CP, (b)  $\text{WO}_3$  NA@CP, (C)  $\text{WO}_2/\text{W}$  CSNA@CP

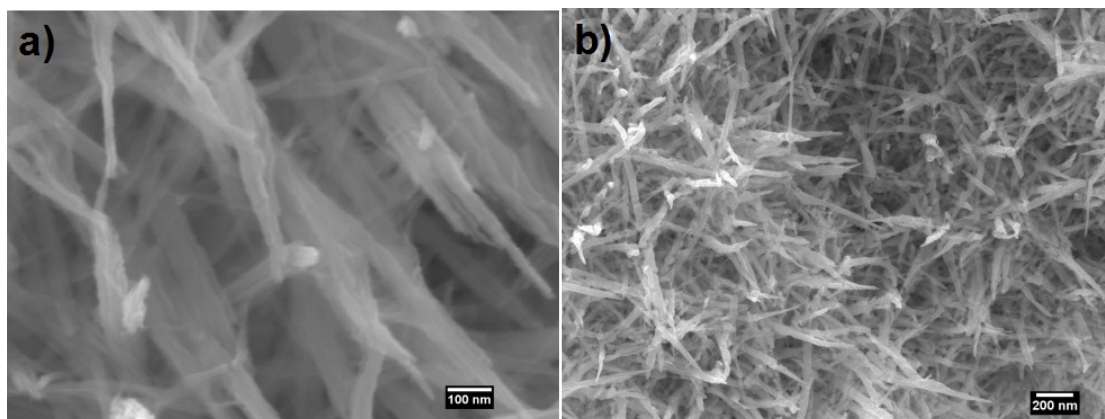

**Fig. S3** The SEM image of precursor (a) and  $\text{WO}_3$  NA@CP.

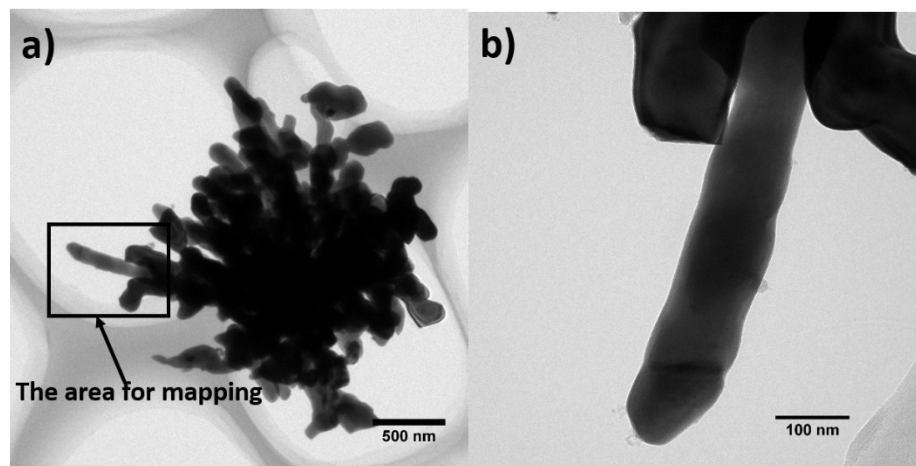

Fig. S4 a) and b) are the TEM images of the W/WO<sub>2</sub> nanorod.

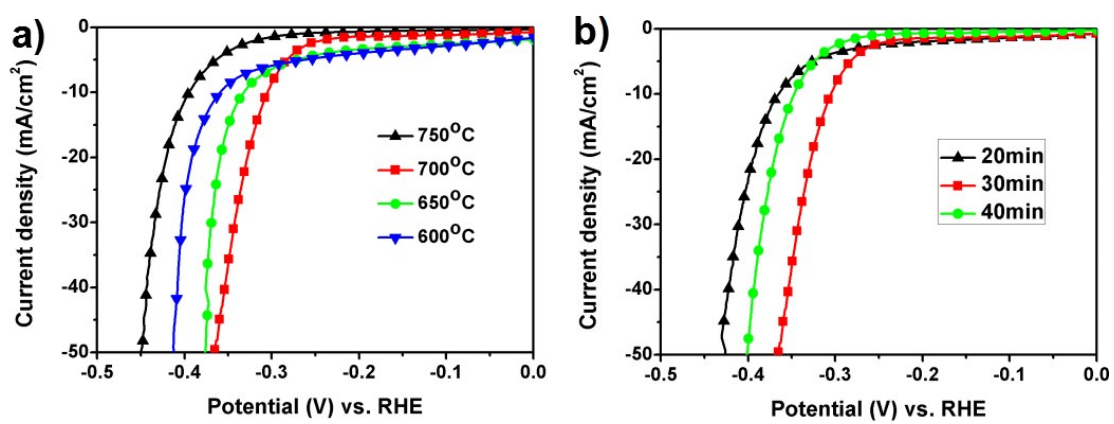

Fig. S5 (a) and (b) show different conditions of annealing, different temperatures and different annealing times are shown for comparison in acidic solution.

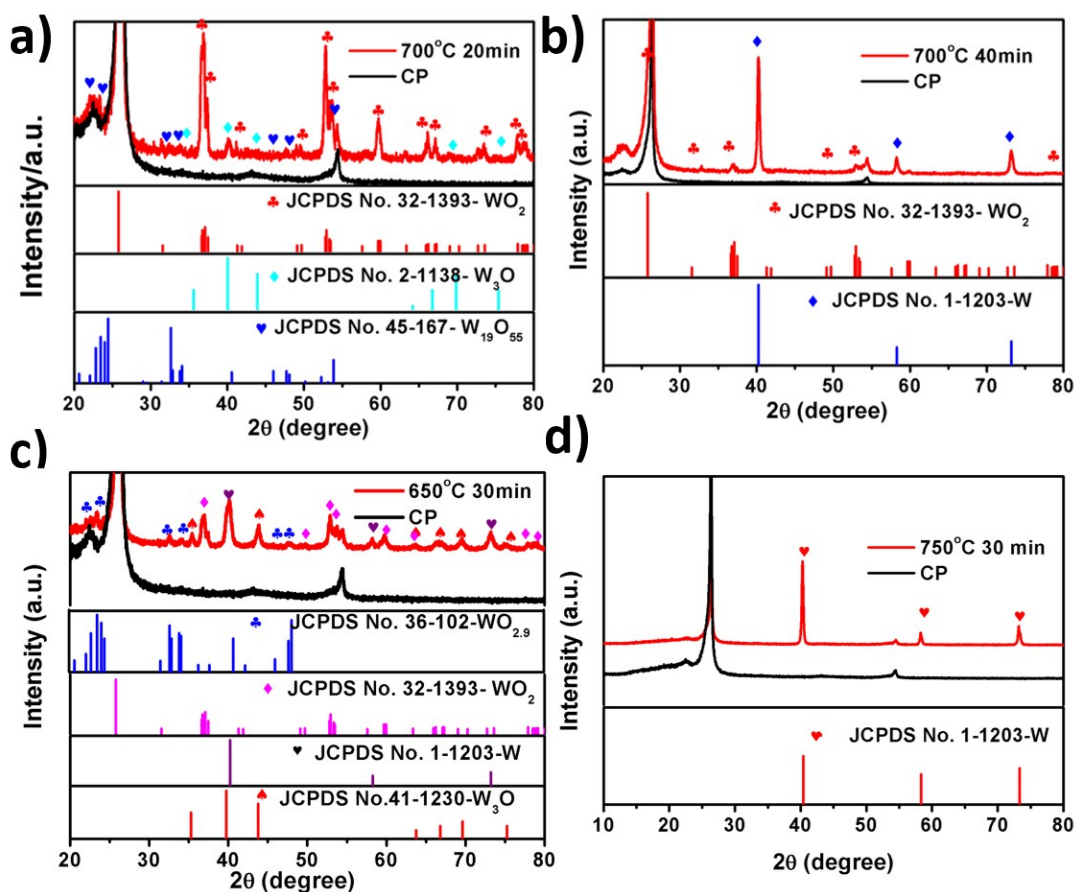

Fig. S6 The XRD patterns of different conditions of annealing.

Table S1 Summary of HER performance of representative tungsten oxides catalysts.

| Catalyst                                                                      | Substrate | Current density (mA/cm <sup>2</sup> ) | Overpotential (mV) | Tafel slope (mV/dec) | Electrolyte                         |
|-------------------------------------------------------------------------------|-----------|---------------------------------------|--------------------|----------------------|-------------------------------------|
| WO <sub>3</sub> /CNT <sup>1</sup>                                             | GCE       | 3.8                                   | 426                | 104                  | 0.1M H <sub>2</sub> SO <sub>4</sub> |
| WO <sub>3</sub> .H <sub>2</sub> O and WO <sub>3</sub> Nanoplates <sup>2</sup> | GCE       | 7.5                                   | 318                | 97                   | 1M H <sub>2</sub> SO <sub>4</sub>   |
| Ta-doped WO <sub>3</sub> <sup>3</sup>                                         | GCE       | 10.72                                 | 528                | 65                   | 1M H <sub>2</sub> SO <sub>4</sub>   |
| WO <sub>3</sub> nanoparticles <sup>4</sup>                                    | GCE       | 20                                    | 406                |                      | 1M H <sub>2</sub> SO <sub>4</sub>   |
| WO <sub>3</sub> Nanorods <sup>5</sup>                                         | GCE       | 20                                    | 396                | 188                  | 1M H <sub>2</sub> SO <sub>4</sub>   |
| WO <sub>3</sub> /C nanoparticles <sup>6</sup>                                 | GCE       | 0.7                                   | 3                  | 29                   | 0.5M H <sub>2</sub> SO <sub>4</sub> |

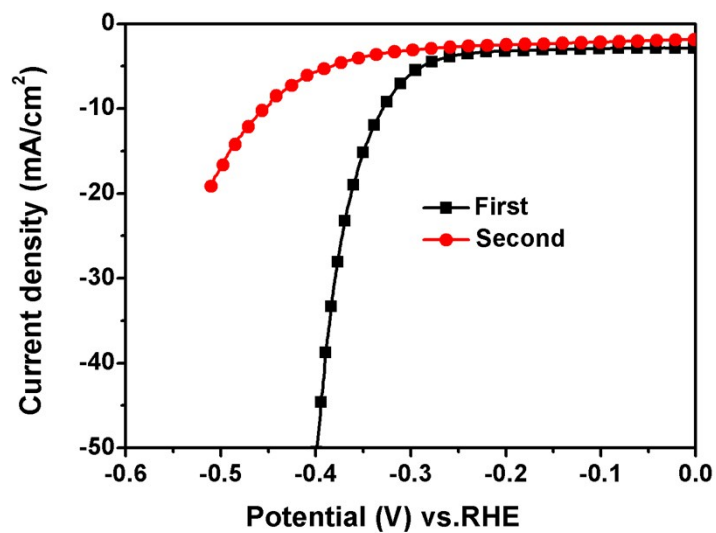

Fig. S7 Polarization curves of the  $\text{WO}_2/\text{W NA@CP}$  in basic solution.

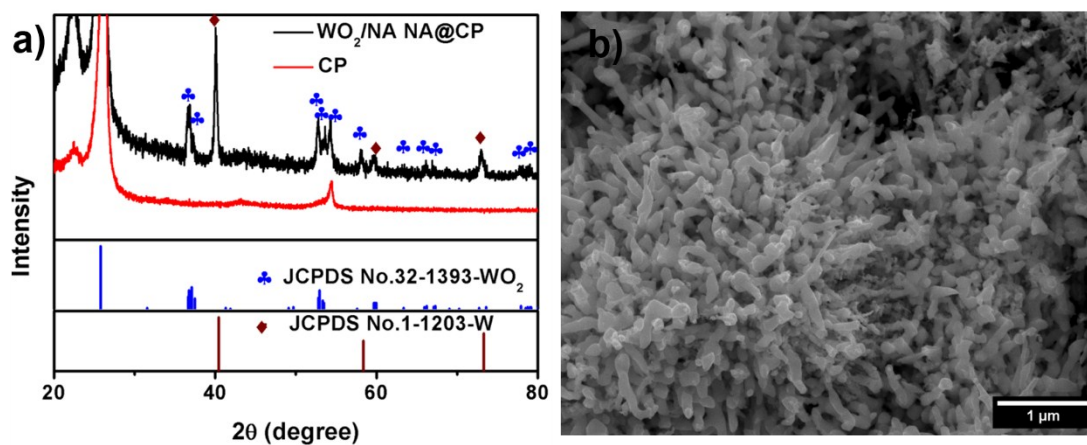

Fig. S8 (a) XRD pattern of  $\text{WO}_2/\text{W NA@CP}$  after it. (b) SEM image of  $\text{WO}_2/\text{W NA@CP}$  after it

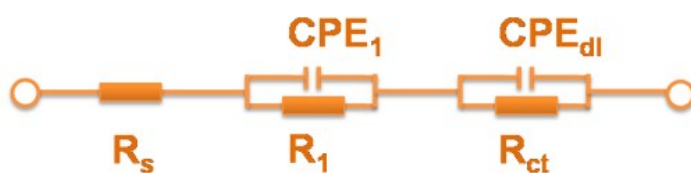

**Fig. S9** Equivalent circuit used to fit the EIS data.  $R_s$  is the overall series resistance,  $CPE_1$  and  $R_1$  are the constant phase element and resistance describing electron transport at substrate/catalyst interface, respectively,  $CPE_{dl}$  is the constant phase element of the catalyst/electrolyte interface, and  $R_{ct}$  is the charge transfer resistance at catalyst/electrolyte interface.

**Table S2.** The fitting results of EIS spectra

| Sample                                     | $R_s(\Omega \text{ cm}^2)$ | $Q_{ct}$<br>( $F \text{ cm}^{-2} \text{ S}^{-n}$<br>$^1/\text{cm}^2$ ) | $N_{ct}$ | $R_{ct}(\Omega$<br>$.\text{cm}^2)$ | $Q_1$<br>( $F \text{ cm}^{-2} \text{ S}^{-n}$<br>$^1/\text{cm}^2$ ) | $N_1$ | $R_1(\Omega$<br>$\text{cm}^2)$ |
|--------------------------------------------|----------------------------|------------------------------------------------------------------------|----------|------------------------------------|---------------------------------------------------------------------|-------|--------------------------------|
| $\text{WO}_3 \text{ NA@CP}$                | 1.45                       | 0.0637                                                                 | 0.651    | 149.4                              | $7.539 \times 10^{-6}$                                              | 0.804 | 0.80                           |
| $\text{WO}_2/\text{W}$<br>$\text{CSNA@CP}$ | 0.92                       | 0.0647                                                                 | 0.823    | 14.69                              | $4.09 \times 10^{-5}$                                               | 0.947 | 1.91                           |

## Reference

- [1] Chekin F, Samira B, Sharifah BAH, Synthesis of Tungsten Oxide Nanorods by the Controlling Precipitation Reaction: Application for Hydrogen Evolution Reaction on a  $\text{WO}_3$  Nanorods/Carbon Nanotubes Composite Film Modified Electrode, *J Chin Chem Soc* 2013; 60: 447-51.
- [2] Hu WH, Han GQ, Dong B, Liu CG, Facile Synthesis of Highly Dispersed  $\text{WO}_3 \cdot \text{H}_2\text{O}$  and  $\text{WO}_3$  Nanoplates for Electrocatalytic Hydrogen Evolution, *J Nanomater* 2015; 346086: 6 pages.
- [3] Xie X, Mu W, Li X, Wei H, Jian Y, Yu Q, Zhang R, Lv K, Tang H, Luo S,

Incorporation of tantalum ions enhances the electrocatalytic activity of hexagonal WO<sub>3</sub> nanowires for hydrogen evolution reaction, *Electrochem Acta* 2014; 134: 201-8.

[4] Ganesan R, Gedanken A, Synthesis of WO<sub>3</sub> nanoparticles using a biopolymer as a template for electrocatalytic hydrogen evolution, *Nanotechnology* 2008; 19: 025702.

[5] Rajeswari J, Kishore PS, Viswanathan B, Varadarajan TK, Facile Hydrogen Evolution Reaction on WO<sub>3</sub> Nanorods, *Nanoscale Res Lett* 2007; 2: 496–503.

[6] Zheng H, Mathe H, Hydrogen evolution reaction on single crystal WO<sub>3</sub>/C nanoparticles supported on carbon in acid and alkaline solution, *Elsevier Ltd* 2011; 36: 1960-4.
